# Supplementary material for: Highly emissive 4-carbazole-appended salen–indium complex: the effect of strong donor–acceptor interaction
Source: Royal Society of Chemistry journal article supplement (doi:10.1039/d3dt02129g), 2023-01-01
Supplement: d3dt02129g1.pdf [file d3dt02129g1.pdf]

## Electronic Supplementary Information

### Highly emissive 4-carbazole-appended salen–indium complex: the effect of strong donor–acceptor interaction

Yoseph Kim,<sup>[a]†</sup> Jaehoon Kim,<sup>[a, b]†</sup> Ji Hye Lee,<sup>[c]</sup> Hyeongkwon Moon,<sup>[a]</sup> Ga Hee Noh,<sup>[d]</sup> Hyonseok Hwang,<sup>[c]</sup> Junseong Lee,<sup>[d]</sup> Jun Hui Park,<sup>\*[a]</sup> Youngjo Kim,<sup>\*[a]</sup> and Myung Hwan Park<sup>\*[b]</sup>

<sup>[a]</sup> Department of Chemistry and BK21+ Program Research Team, Chungbuk National University, Cheongju, Chungbuk 28644, Republic of Korea

<sup>[b]</sup> Department of Chemistry Education, Chungbuk National University, Cheongju, Chungbuk 28644, Republic of Korea

<sup>[c]</sup> Department of Chemistry and Institute for Molecular Science and Fusion Technology, Kangwon National University, Chuncheon, Gangwon 24341, Republic of Korea

<sup>[d]</sup> Department of Chemistry, Chonnam National University, Gwangju 61186, Republic of Korea

†Y. Kim and J. Kim contributed equally to this work.

### Contents

|                                                                                                  |    |
|--------------------------------------------------------------------------------------------------|----|
| <sup>1</sup> H and <sup>13</sup> C NMR Spectra of <b>CBZIn1</b> and <b>CBZIn2</b> .....          | S2 |
| Crystallographic data and parameters of <b>CBZIn1</b> .....                                      | S4 |
| Cyclic voltammograms and Electrochemical data of <b>CBZIn1</b> and <b>CBZIn2</b> .....           | S6 |
| PL spectra of <b>CBZIn1</b> and <b>CBZIn2</b> in THF (20 μM) at 298 K.....                       | S7 |
| UV–vis absorption and PL data of <b>CBZIn2</b> in various organic solvents (20 μM) at 298 K..... | S7 |
| Emission decay curves of <b>CBZIn2</b> .....                                                     | S8 |
| Computational results of <b>CBZIn2</b> .....                                                     | S9 |

# $^1\text{H}$ and $^{13}\text{C}$ NMR Spectra

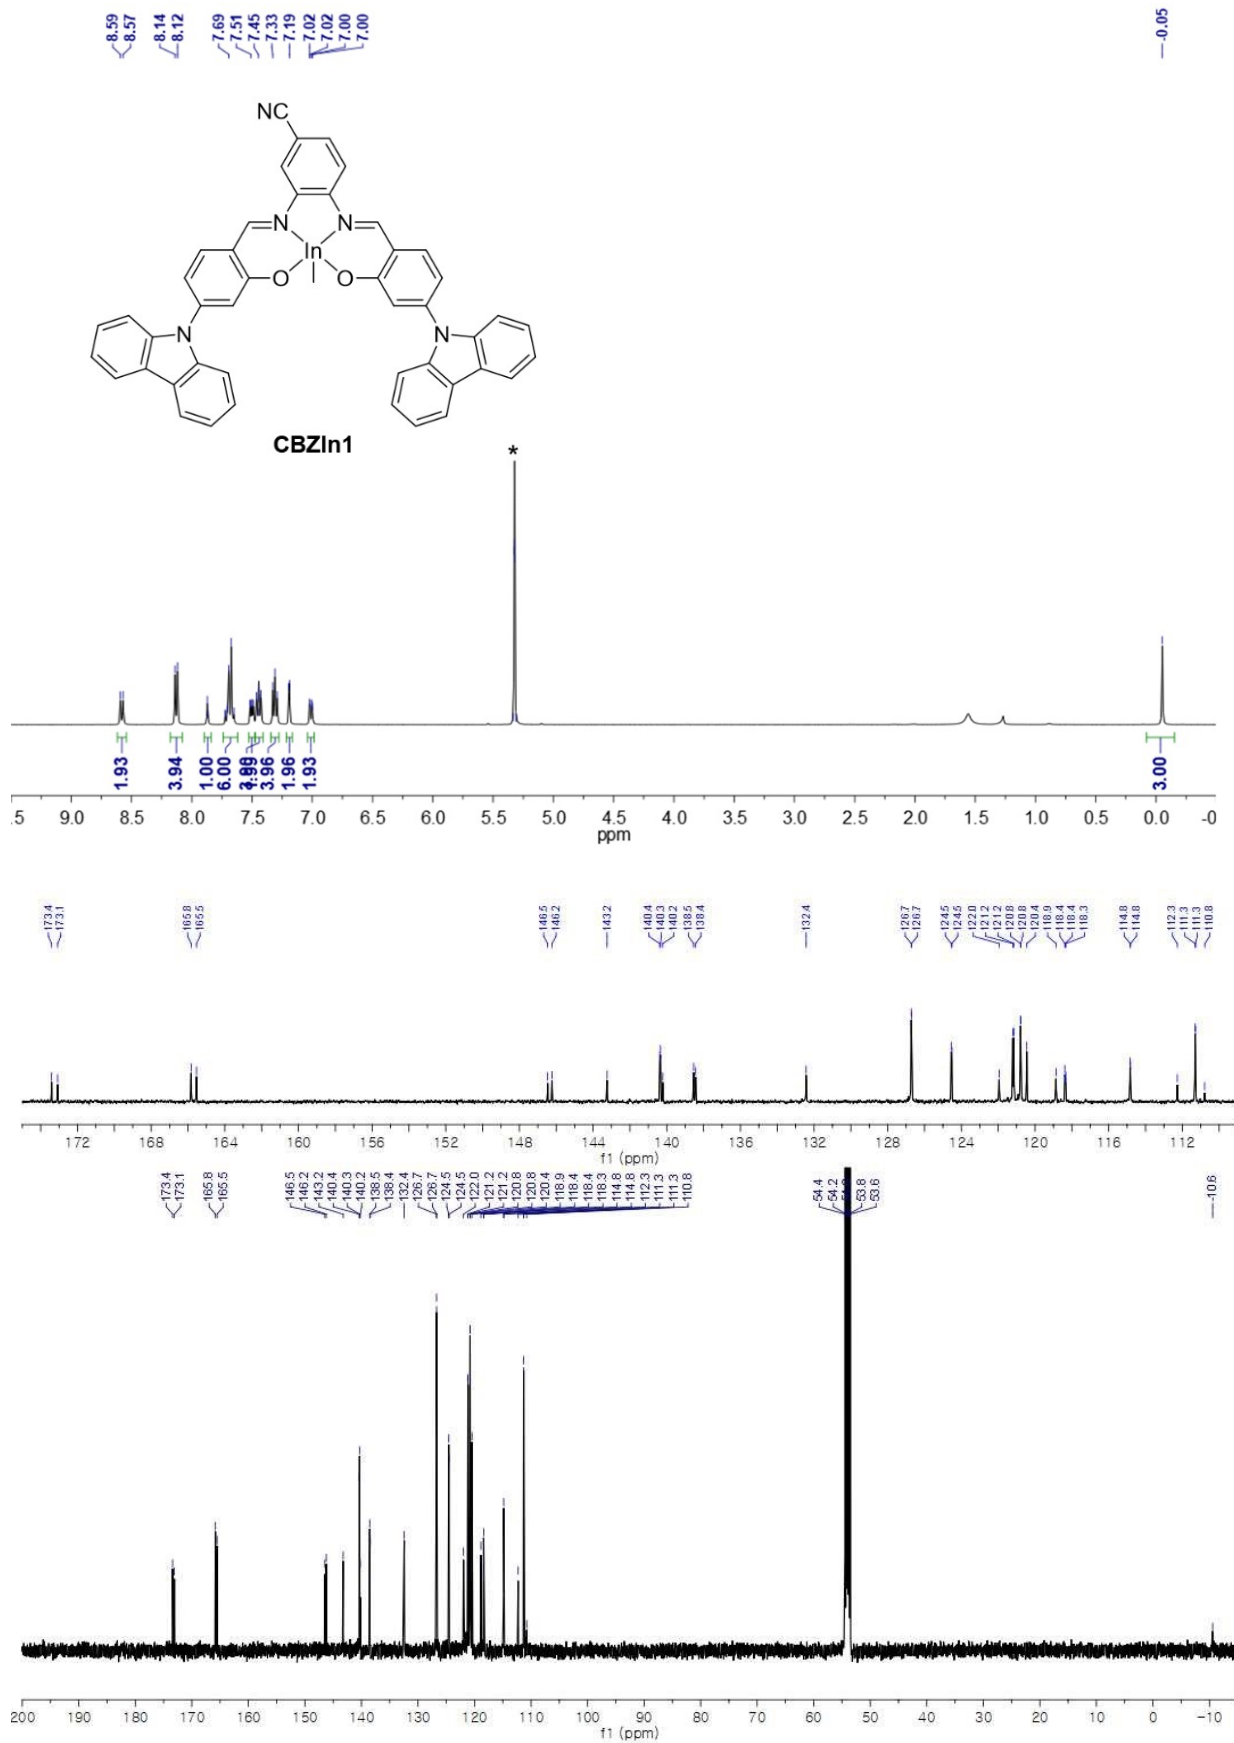

**Fig. S1**  $^1\text{H}$  (top) and  $^{13}\text{C}$  (bottom) NMR spectra of **CBZIn1** (\* from residual  $\text{CH}_2\text{Cl}_2$  in  $\text{CD}_2\text{Cl}_2$ ).

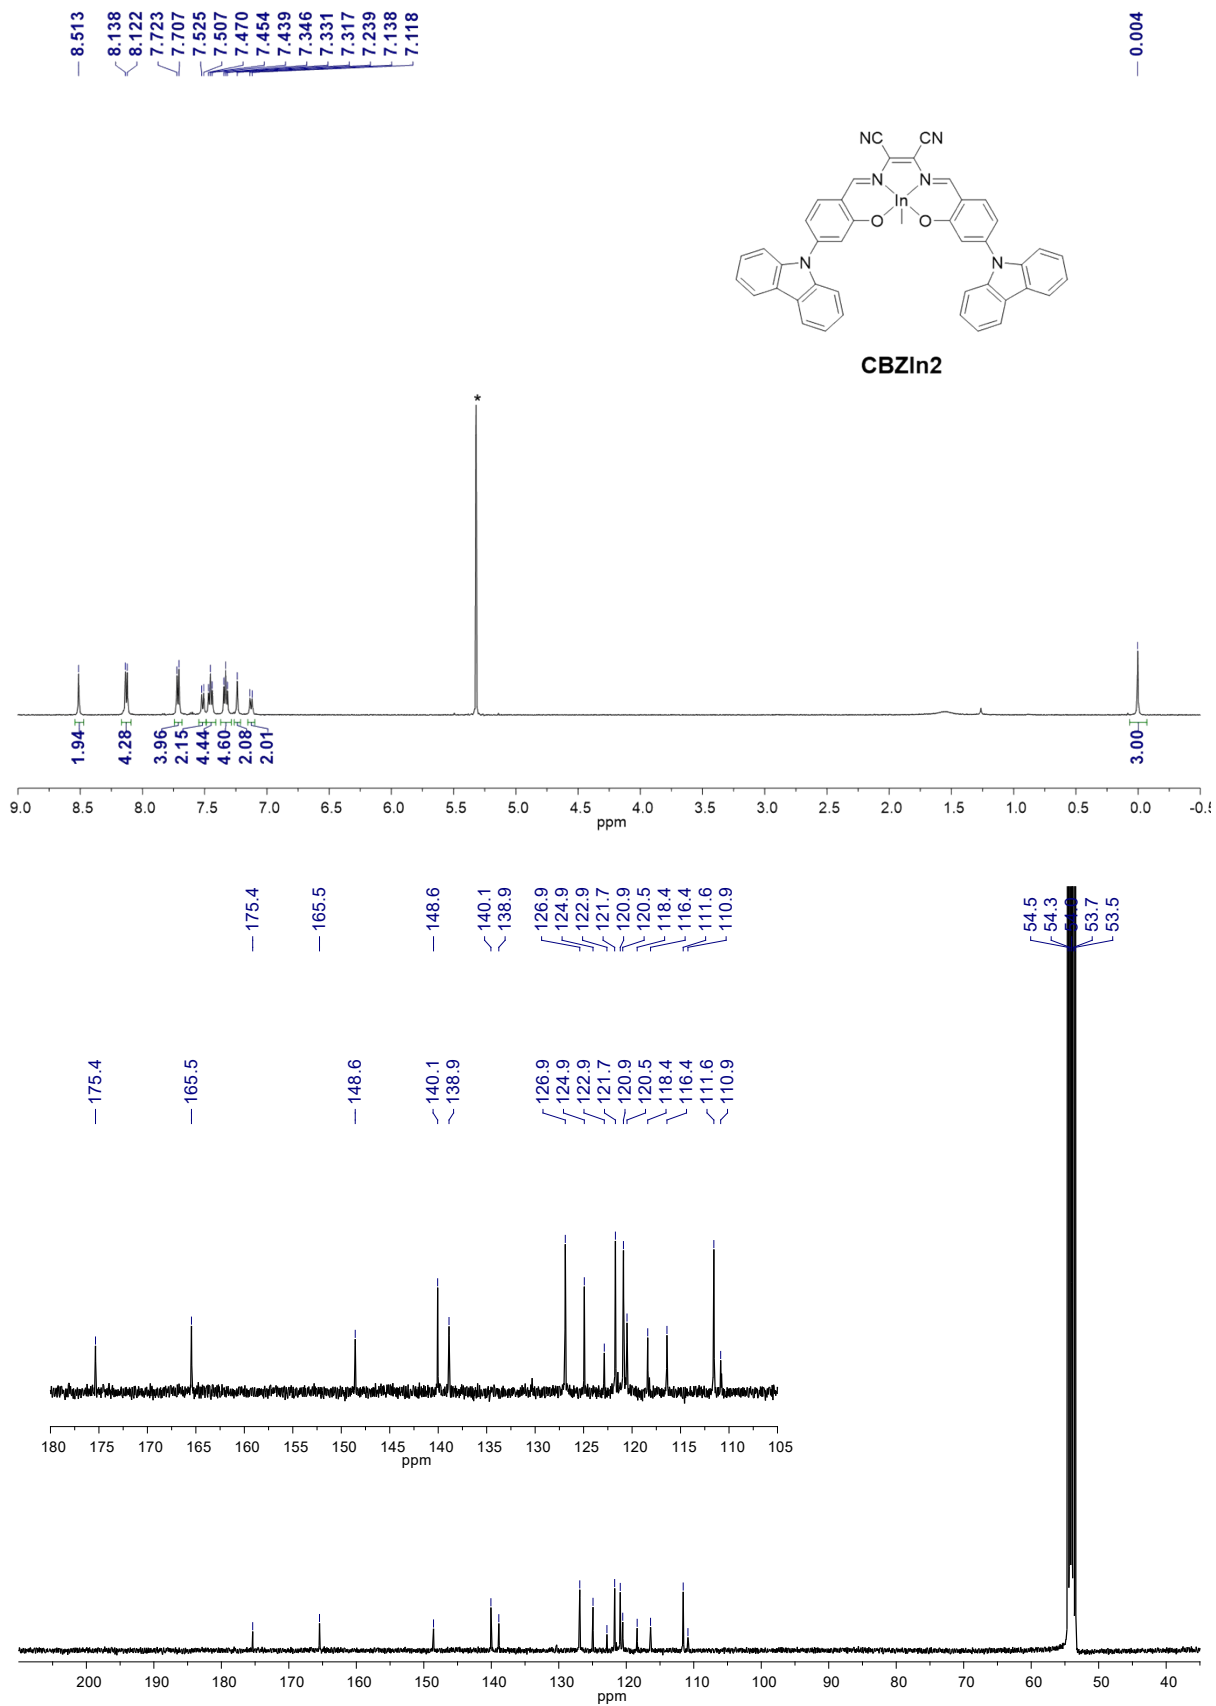

**Fig. S2** <sup>1</sup>H (top) and <sup>13</sup>C (bottom) NMR spectra of **CBZIn2** (\* from residual CH<sub>2</sub>Cl<sub>2</sub> in CD<sub>2</sub>Cl<sub>2</sub>).

**Table S1** Crystallographic data and parameters for **CBZIn1**

| Compound                                                               | C <sub>45</sub> H <sub>30</sub> InN <sub>4</sub> O <sub>2</sub> ·(C <sub>7</sub> H <sub>8</sub> )·0.5(C <sub>2</sub> N <sub>2</sub> ) |
|------------------------------------------------------------------------|---------------------------------------------------------------------------------------------------------------------------------------|
| Formula                                                                | C <sub>53</sub> H <sub>38</sub> InN <sub>5</sub> O <sub>2</sub>                                                                       |
| Formula weight                                                         | 891.70                                                                                                                                |
| Crystal system                                                         | Triclinic                                                                                                                             |
| Space group                                                            | <i>P</i> $\bar{1}$                                                                                                                    |
| <i>a</i> (Å)                                                           | 11.7454(4)                                                                                                                            |
| <i>b</i> (Å)                                                           | 12.2305(4)                                                                                                                            |
| <i>c</i> (Å)                                                           | 15.3406(5)                                                                                                                            |
| $\alpha$ (°)                                                           | 78.228(2)                                                                                                                             |
| $\beta$ (°)                                                            | 78.289(2)                                                                                                                             |
| $\gamma$ (°)                                                           | 69.581(2)                                                                                                                             |
| <i>V</i> (Å <sup>3</sup> )                                             | 2000.83(12)                                                                                                                           |
| <i>Z</i>                                                               | 2                                                                                                                                     |
| $\rho_{\text{calc}}$ (g cm <sup>-3</sup> )                             | 1.480                                                                                                                                 |
| $\mu$ (mm <sup>-1</sup> )                                              | 0.642                                                                                                                                 |
| <i>F</i> (000)                                                         | 912                                                                                                                                   |
| <i>T</i> (K)                                                           | 100                                                                                                                                   |
| Scan mode                                                              | <i>multi-scan</i>                                                                                                                     |
| <i>hkl</i> range                                                       | -14 < <i>h</i> < 14, -14 < <i>k</i> < 14, -18 < <i>l</i> < 18                                                                         |
| Measurement reflns                                                     | 27090                                                                                                                                 |
| Unique reflns [ <i>R</i> <sub>int</sub> ]                              | 7557[0.0898]                                                                                                                          |
| Reflns used for refinement                                             | 7557                                                                                                                                  |
| Refined parameters                                                     | 570                                                                                                                                   |
| <i>R</i> <sub>1</sub> <sup><i>a</i></sup> ( <i>I</i> > 2σ( <i>I</i> )) | 0.0559                                                                                                                                |
| <i>wR</i> <sub>2</sub> <sup><i>b</i></sup> all data                    | 0.0984                                                                                                                                |
| GOF on <i>F</i> <sup>2</sup>                                           | 0.981                                                                                                                                 |
| $\rho_{\text{fin}}$ (max/min) (e Å <sup>-3</sup> )                     | 0.519, -0.936                                                                                                                         |

<sup>*a*</sup>  $R_1 = \sum ||F_o| - |F_c|| / \sum |F_o|$ . <sup>*b*</sup>  $wR_2 = \{[\sum w(F_o^2 - F_c^2)^2] / [\sum w(F_o^2)^2]\}^{1/2}$ .

**Table S2** Selected bond lengths (Å) and angles (°) for **CBZIn1**

| Compound  | CBZIn1     |
|-----------|------------|
|           | lengths    |
| In–O1     | 2.092(3)   |
| In–O2     | 2.071(3)   |
| In–N1     | 2.251(3)   |
| In–N2     | 2.288(4)   |
| In–C45    | 2.126(5)   |
|           | Angles     |
| O1–In–O2  | 91.98(11)  |
| O1–In–N1  | 82.75(12)  |
| O1–In–N2  | 140.68(12) |
| O2–In–N1  | 125.89(13) |
| O2–In–N2  | 82.21(12)  |
| O1–In–C45 | 111.95(16) |
| O2–In–C45 | 111.49(15) |
| N1–In–N2  | 70.10(12)  |
| C45–In–N1 | 120.39(15) |
| C45–In–N2 | 106.28(2)  |

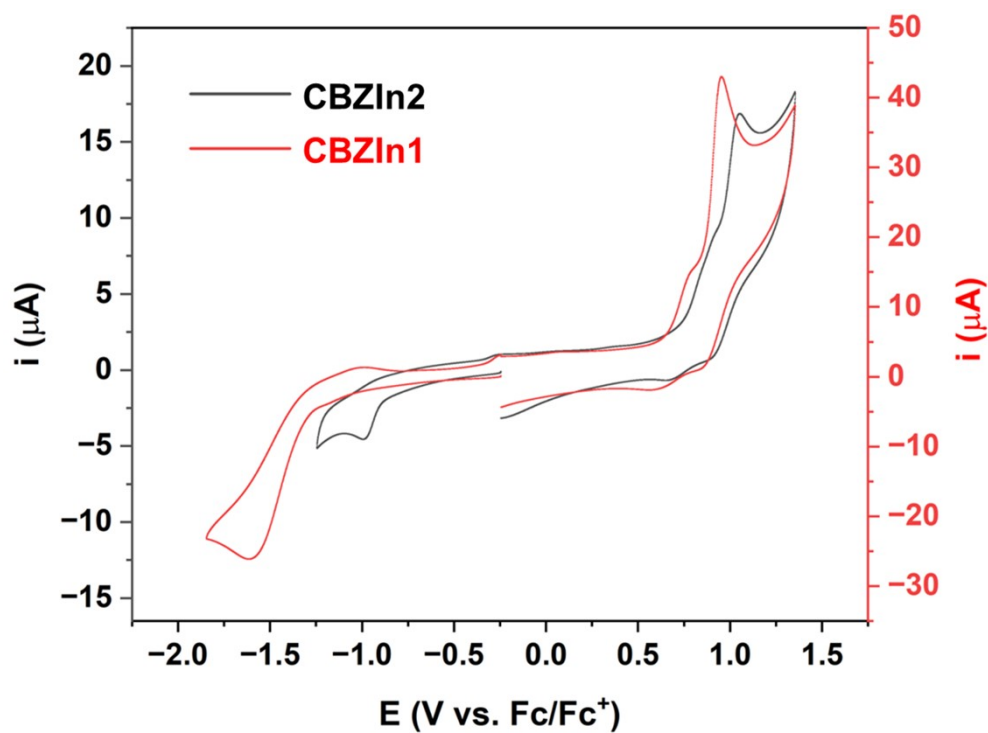

**Fig. S3** Cyclic voltammograms (CV) for **CBZIn1** and **CBZIn2** (1 mM in MeCN, scan rate = 100 mV/s).

**Table S3** Electrochemical data of **CBZIn1** and **CBZIn2**

| Compound      | $E_{\text{ox}}$ (V) <sup>a</sup> | $E_{\text{red}}$ (V) <sup>a</sup> | $E_{\text{HOMO}}$ (eV) | $E_{\text{LUMO}}$ (eV) | $E_{\text{g}}$ (eV) <sup>b</sup> |
|---------------|----------------------------------|-----------------------------------|------------------------|------------------------|----------------------------------|
| <b>CBZIn1</b> | 0.79                             | -1.33                             | -5.59                  | -3.47                  | 2.12                             |
| <b>CBZIn2</b> | 0.80                             | -0.87                             | -5.60                  | -3.93                  | 1.67                             |

<sup>a</sup>The oxidation and reduction onset potentials in MeCN (1 mM, scan rate 100 mVs<sup>-1</sup>) with reference to a ferrocene/ferrocenium (Fc/Fc<sup>+</sup>) redox couple. <sup>b</sup>Electrochemical band gap.

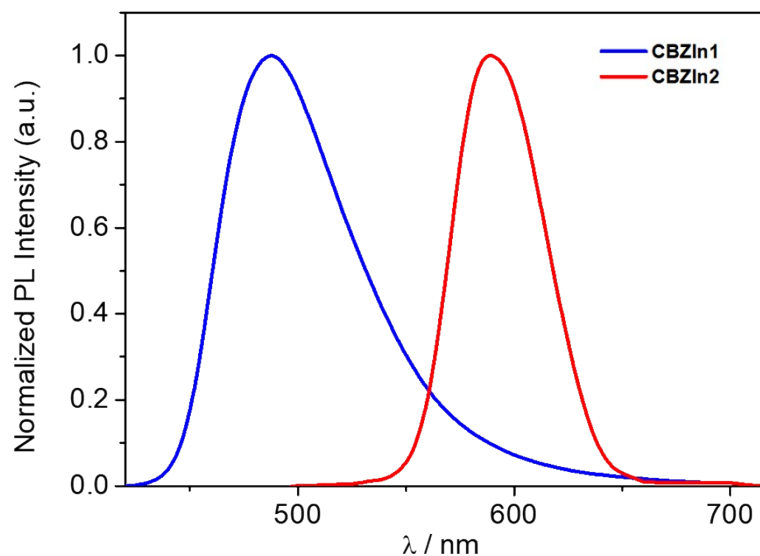

**Fig. S4** PL spectra of **CBZIn1** and **CBZIn2** in THF (20  $\mu$ M) at 298 K.

**Table S4** UV–vis absorption and PL data of **CBZIn2** in various organic solvents (20  $\mu$ M) at 298 K

| Solvent | $\lambda_{\text{abs}}/\text{nm}$ ( $\epsilon, \times 10^{-3} \text{ M}^{-1} \text{ cm}^{-1}$ ) | $\lambda_{\text{ex}}/\text{nm}$ | $\lambda_{\text{em}}/\text{nm}$ | $\Phi_{\text{PL}}/\%$ |
|---------|------------------------------------------------------------------------------------------------|---------------------------------|---------------------------------|-----------------------|
| THF     | 382 (54.46), 431 (34.29), 561 (29.14), 590 (28.01)                                             | 384                             | 589                             | 53.9                  |
| DMF     | 381 (143.36), 431 (92.59), 551 (58.73), 577 (54.70)                                            | 398                             | 550                             | 18.5                  |
| DMSO    | 383 (44.62), 433 (32.08), 559 (31.44), 578 (29.99)                                             | 394                             | 531                             | 6.8                   |



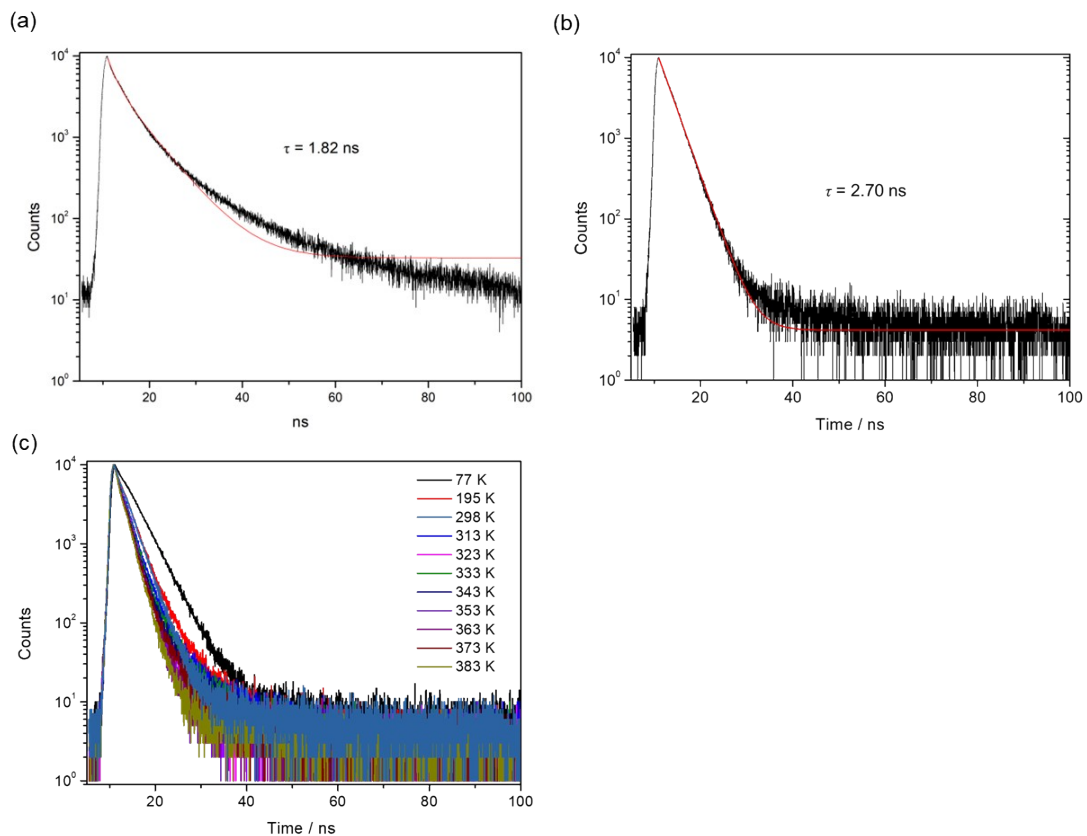

**Fig. S5** Emission decay curves of (a) **CBZIn1** and (b) **CBZIn2** in toluene (20  $\mu$ M) solutions at 298 K (The red-line corresponds to the single-exponential fitting curves). (c) Emission decay curves of **CBZIn2** in toluene at variable temperature.

**Table S5** Computed absorption wavelengths ( $\lambda_{\text{calc}}$  in nm) and oscillator strengths ( $f_{\text{calc}}$ ) for **CBZIn1** from TD-B3LYP calculations using the B3LYP geometries at the ground state ( $S_0$ )- and first singlet excited state ( $S_1$ )-optimized geometries in toluene

| state | $\lambda_{\text{calc}}$ (nm) | $f_{\text{calc}}$ | major contribution |   |                |
|-------|------------------------------|-------------------|--------------------|---|----------------|
| $S_0$ |                              |                   |                    |   |                |
| 1     | 490.51                       | 0.5086            | HOMO               | → | LUMO (75.7%)   |
| 2     | 464.99                       | 0.2153            | HOMO-1             | → | LUMO (82.8%)   |
| 3     | 445.41                       | 0.3551            | HOMO               | → | LUMO+1 (82.8%) |
| 4     | 428.81                       | 0.0132            | HOMO-4             | → | LUMO (62.5%)   |
| 5     | 423.66                       | 0.0482            | HOMO-1             | → | LUMO+1 (61.3%) |
| $S_1$ |                              |                   |                    |   |                |
| 1     | 623.27                       | 0.1495            | HOMO               | → | LUMO (90.3%)   |
| 2     | 575.08                       | 0.2750            | HOMO-1             | → | LUMO (92.5%)   |
| 3     | 542.65                       | 0.0046            | HOMO-2             | → | LUMO (96.6%)   |
| 4     | 498.57                       | 0.0010            | HOMO-3             | → | LUMO (99.5%)   |
| 5     | 480.10                       | 0.0001            | HOMO-4             | → | LUMO (99.8%)   |

**Table S6** Molecular orbital energies (in eV) and molecular orbital distributions (in %) of **CBZIn1** at the ground state ( $S_0$ ) and first singlet excited state ( $S_1$ ) optimized geometries in toluene

|        | E (eV) | benzonitrile | In-Me | 4-CBZ | Phenoxy |
|--------|--------|--------------|-------|-------|---------|
| $S_0$  |        |              |       |       |         |
| LUMO+3 | -0.84  | 0.1          | 0.0   | 99.1  | 0.8     |
| LUMO+2 | -1.14  | 71.6         | 0.2   | 3.4   | 24.8    |
| LUMO+1 | -2.28  | 35.6         | 0.3   | 3.9   | 60.3    |
| LUMO   | -2.51  | 40.2         | 0.2   | 3.5   | 56.1    |
| HOMO   | -5.48  | 7.9          | 0.6   | 75.6  | 15.9    |
| HOMO-1 | -5.54  | 3.0          | 0.0   | 85.1  | 11.8    |
| HOMO-2 | -5.88  | 0.0          | 0.0   | 99.8  | 0.2     |
| HOMO-3 | -5.90  | 0.2          | 0.1   | 98.6  | 1.0     |
| $S_1$  |        |              |       |       |         |
| LUMO+3 | -0.86  | 0.0          | 0.0   | 99.5  | 0.5     |
| LUMO+2 | -1.24  | 76.5         | 0.2   | 1.9   | 21.4    |
| LUMO+1 | -2.10  | 37.5         | 0.4   | 3.4   | 58.8    |
| LUMO   | -3.02  | 35.3         | 0.4   | 3.0   | 61.4    |
| HOMO   | -5.34  | 5.9          | 0.4   | 77.0  | 16.7    |
| HOMO-1 | -5.59  | 4.9          | 0.6   | 81.3  | 13.1    |
| HOMO-2 | -5.73  | 8.0          | 3.2   | 19.9  | 69.0    |
| HOMO-3 | -5.86  | 0.0          | 0.0   | 99.9  | 0.2     |

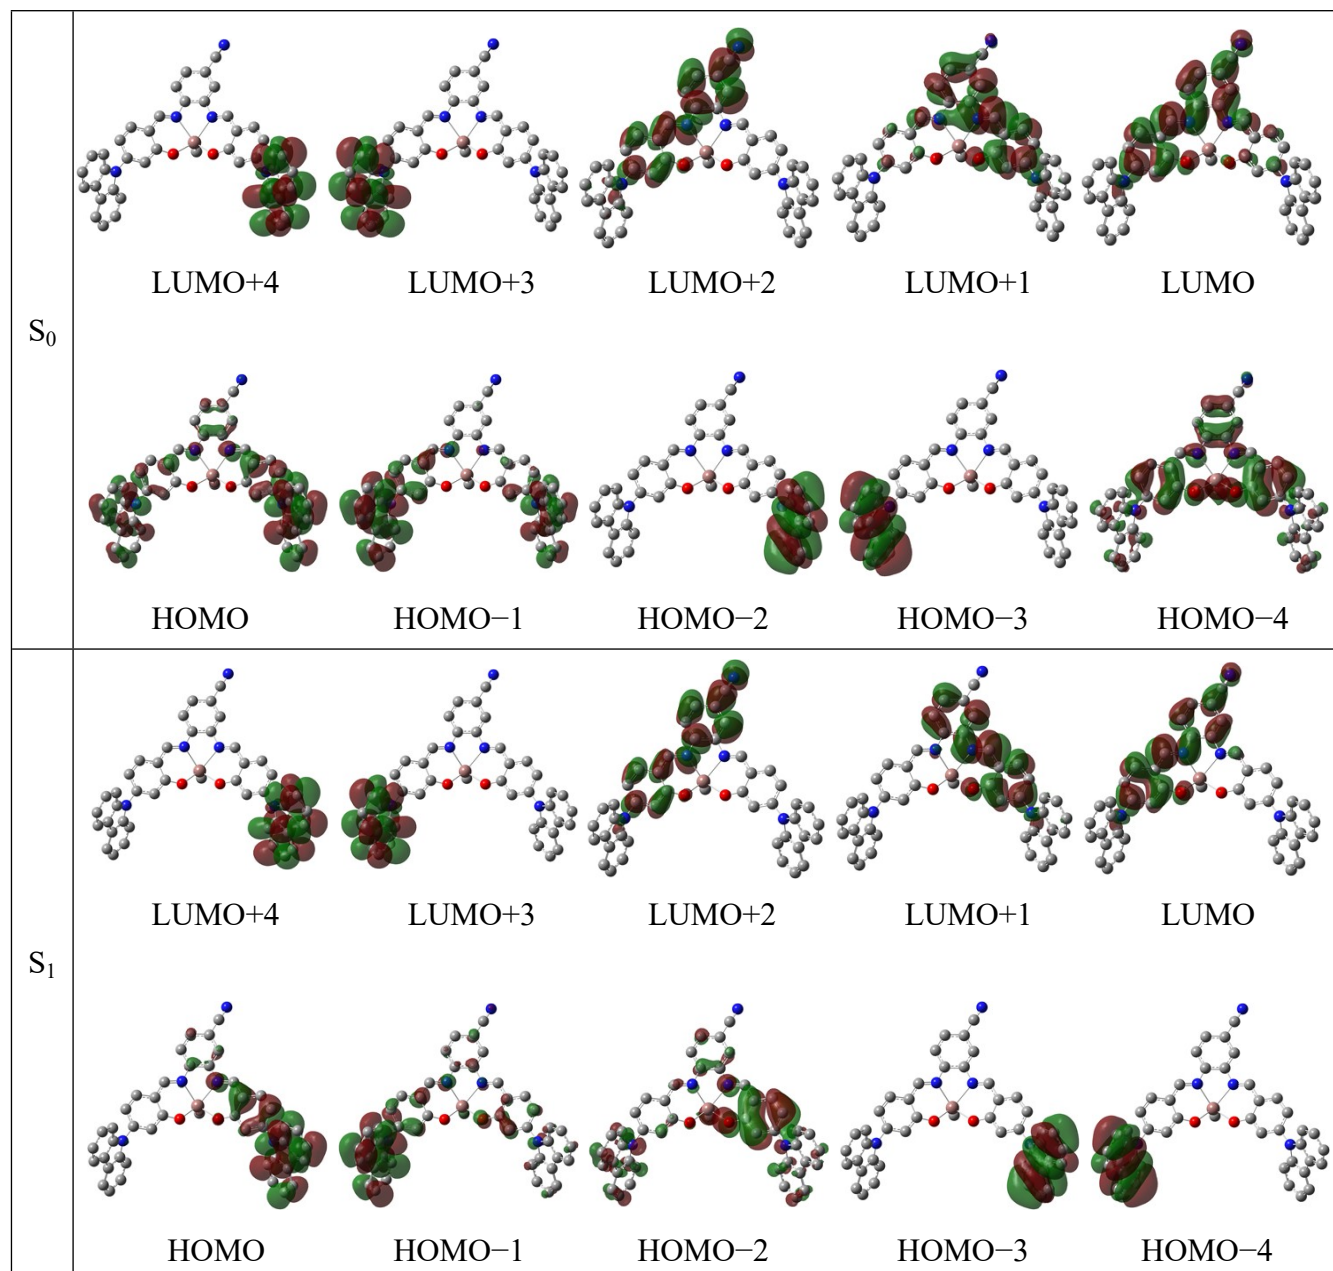

**Fig. S6** The selected frontier orbitals of **CBZIn1** from TD-B3LYP calculations (Isovalue = 0.04 a.u.) at the ground state (S<sub>0</sub>)- and first singlet excited state (S<sub>1</sub>)-optimized geometries in toluene.

**Table S7** Computed absorption wavelengths ( $\lambda_{\text{calc}}$  in nm) and oscillator strengths ( $f_{\text{calc}}$ ) for **CBZIn2** from TD-B3LYP calculations using the B3LYP geometries at the ground state ( $S_0$ )- and first singlet excited state ( $S_1$ )-optimized geometries in toluene

| state | $\lambda_{\text{calc}}$ (nm) | $f_{\text{calc}}$ | major contribution |   |              |
|-------|------------------------------|-------------------|--------------------|---|--------------|
| $S_0$ |                              |                   |                    |   |              |
| 1     | 649.34                       | 0.6496            | HOMO               | → | LUMO (98.6%) |
| 2     | 591.56                       | 0.1697            | HOMO-1             | → | LUMO (99.1%) |
| 3     | 533.83                       | 0.0724            | HOMO-2             | → | LUMO (97.8%) |
| 4     | 522.73                       | 0.0001            | HOMO-3             | → | LUMO (53.8%) |
| 5     | 471.71                       | 0.0735            | HOMO-5             | → | LUMO (95.2%) |
| $S_1$ |                              |                   |                    |   |              |
| 1     | 871.51                       | 0.0008            | HOMO               | → | LUMO (99.1%) |
| 2     | 729.03                       | 0.3077            | HOMO-1             | → | LUMO (99.3%) |
| 3     | 638.20                       | 0.0104            | HOMO-2             | → | LUMO (98.2%) |
| 4     | 618.08                       | 0.0039            | HOMO-3             | → | LUMO (98.5%) |
| 5     | 604.91                       | 0.2047            | HOMO-4             | → | LUMO (95.8%) |

**Table S8** Molecular orbital energies (in eV) and molecular orbital distributions (in %) of **CBZIn2** at the ground state ( $S_0$ ) and first singlet excited state ( $S_1$ ) optimized geometries in toluene

|        | E (eV) | 1,2-<br>dicyanoethylene | In-Me | 4-CBZ | Phenoxy |
|--------|--------|-------------------------|-------|-------|---------|
| $S_0$  |        |                         |       |       |         |
| LUMO+3 | -0.92  | 0.1                     | 0.0   | 99.1  | 0.8     |
| LUMO+2 | -1.44  | 61.9                    | 0.1   | 4.1   | 34.0    |
| LUMO+1 | -2.21  | 28.1                    | 1.2   | 5.0   | 65.6    |
| LUMO   | -3.27  | 42.1                    | 0.2   | 4.1   | 53.6    |
| HOMO   | -5.55  | 10.5                    | 0.9   | 69.4  | 19.2    |
| HOMO-1 | -5.68  | 1.8                     | 0.0   | 86.6  | 11.6    |
| HOMO-2 | -5.98  | 0.0                     | 0.0   | 100.0 | 0.0     |
| HOMO-3 | -5.98  | 0.0                     | 0.0   | 100.0 | 0.0     |
| $S_1$  |        |                         |       |       |         |
| LUMO+3 | -0.90  | 0.2                     | 0.0   | 99.2  | 0.6     |
| LUMO+2 | -1.62  | 61.0                    | 0.1   | 1.9   | 37.0    |
| LUMO+1 | -2.35  | 30.5                    | 1.2   | 2.7   | 65.6    |
| LUMO   | -3.61  | 44.6                    | 0.2   | 2.1   | 53.0    |
| HOMO   | -5.40  | 0.0                     | 0.0   | 97.7  | 2.3     |
| HOMO-1 | -5.64  | 3.8                     | 0.2   | 85.3  | 10.6    |
| HOMO-2 | -5.89  | 0.2                     | 0.1   | 98.5  | 1.3     |
| HOMO-3 | -5.95  | 0.0                     | 0.0   | 99.8  | 0.2     |

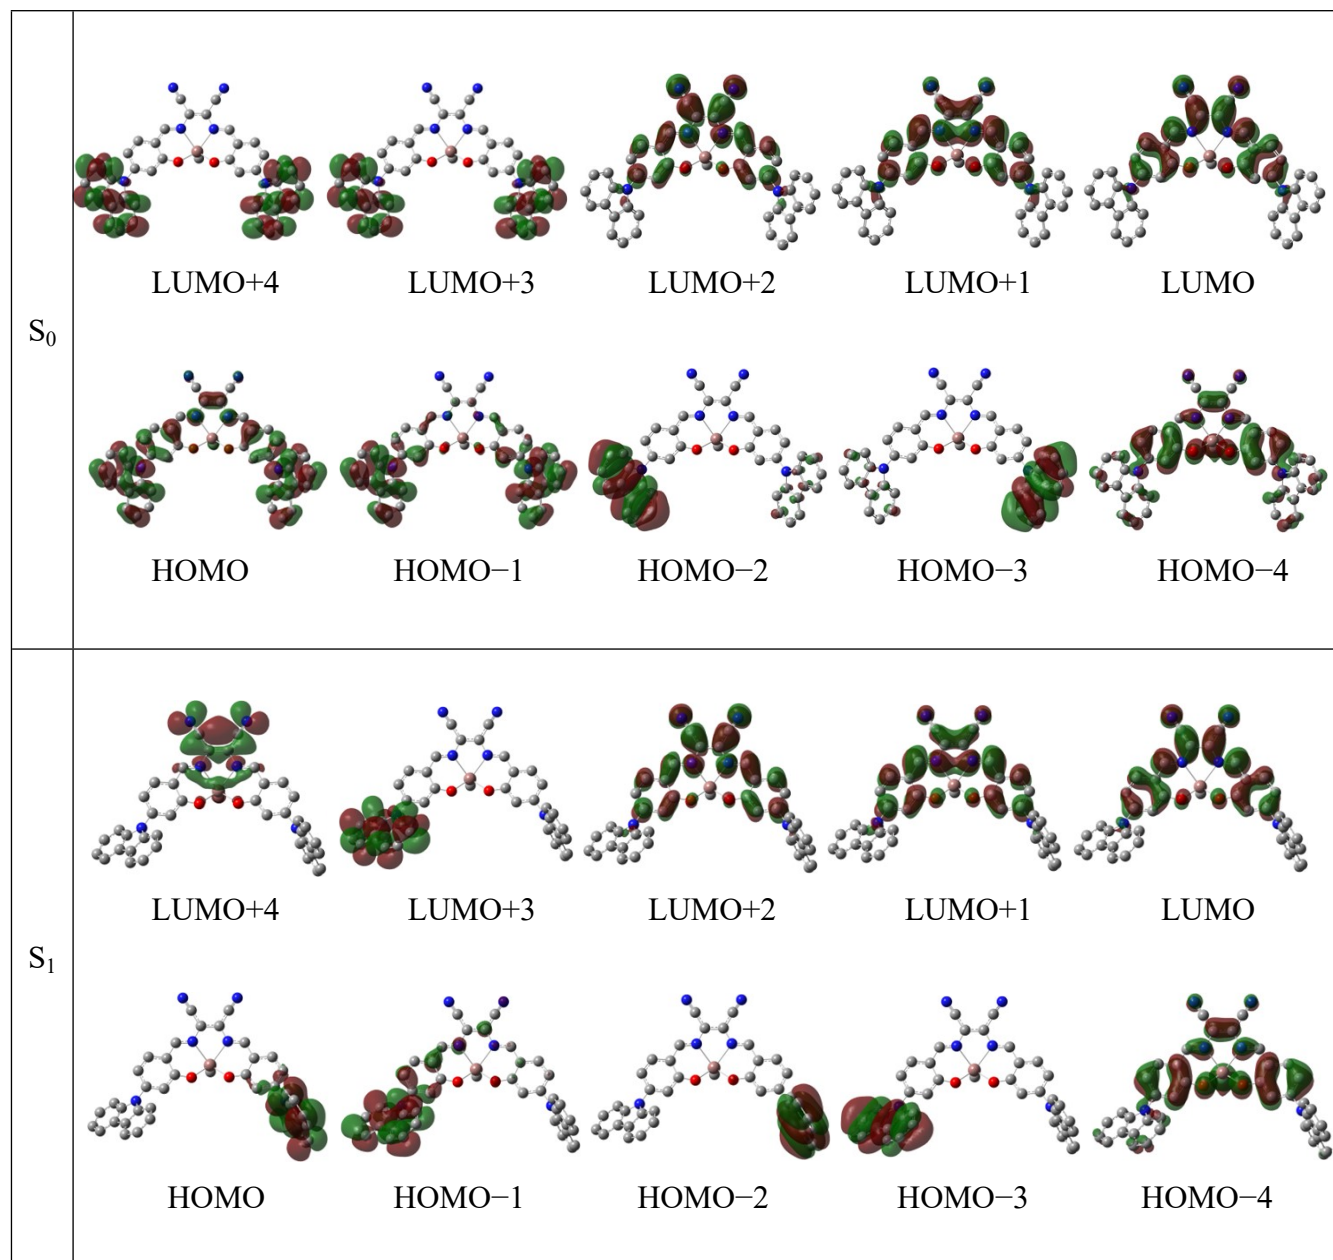

**Fig. S7** The selected frontier orbitals of **CBZIn2** from TD-B3LYP calculations (Isovalue = 0.04 a.u.) at the ground state (S<sub>0</sub>)- and first singlet excited state (S<sub>1</sub>)-optimized geometries in toluene.

**Table S9** Cartesian coordinates of the ground state ( $S_0$ ) fully optimized geometry in toluene of **CBZIn1** from B3LYP calculations (in Å)

| Atom | X         | Y         | Z         | H | -0.814138 | 3.030803  | -3.484193 | C | -6.793195 | -3.454870 | -0.467660 |
|------|-----------|-----------|-----------|---|-----------|-----------|-----------|---|-----------|-----------|-----------|
| N    | -1.227474 | 3.242579  | 0.011058  | H | 0.954410  | 2.954737  | -3.491290 | C | -6.385098 | -1.739473 | 2.716469  |
| N    | 1.408243  | 3.123476  | 0.000917  | H | 2.896900  | -1.714540 | -0.649145 | C | -7.084988 | -3.284559 | 0.940868  |
| O    | -1.499897 | 0.488184  | -0.752563 | H | -3.146322 | -1.439644 | -0.644308 | C | -5.892277 | -3.203143 | -3.091925 |
| O    | 1.425971  | 0.351399  | -0.753277 | C | 6.040293  | -2.708106 | 1.360622  | H | -4.778140 | -1.473905 | -2.435549 |
| C    | -2.684457 | 0.612263  | -0.228332 | C | 5.553999  | -2.927896 | -0.852605 | C | -7.225122 | -4.372818 | -1.432371 |
| C    | -3.536487 | -0.522128 | -0.220441 | C | 6.100918  | -2.309853 | 2.699874  | C | -7.175423 | -2.468456 | 3.603940  |
| C    | -4.808282 | -0.478967 | 0.332737  | C | 6.665115  | -3.900557 | 0.916035  | H | -5.804183 | -0.891475 | 3.060181  |
| C    | -5.292925 | 0.712488  | 0.931631  | C | 5.120018  | -2.738770 | -2.168220 | C | -7.870706 | -4.000309 | 1.851810  |
| C    | -4.478715 | 1.819684  | 0.955957  | C | 6.360238  | -4.037311 | -0.493322 | C | -6.767807 | -4.244976 | -2.741012 |
| H    | -4.842767 | 2.738867  | 1.408280  | C | 6.826600  | -3.107984 | 3.582978  | H | -5.553019 | -3.112814 | -4.119668 |
| C    | -3.177688 | 1.822416  | 0.383526  | H | 5.595578  | -1.416323 | 3.047690  | H | -7.912133 | -5.169922 | -1.162676 |
| C    | -2.423040 | 3.025780  | 0.498442  | C | 7.387301  | -4.685262 | 1.822823  | C | -7.917015 | -3.584243 | 3.179755  |
| H    | -2.897671 | 3.820540  | 1.082094  | C | 5.485231  | -3.693480 | -3.116003 | H | -7.211483 | -2.167302 | 4.646831  |
| C    | 2.575621  | 2.799153  | 0.492403  | H | 4.522850  | -1.879190 | -2.448906 | H | -8.430393 | -4.872787 | 1.526816  |
| H    | 3.119658  | 3.547524  | 1.077114  | C | 6.712305  | -4.983070 | -1.463676 | H | -7.092418 | -4.951404 | -3.498907 |
| C    | 3.219826  | 1.531141  | 0.377868  | C | 7.469712  | -4.281165 | 3.152703  | H | -8.523121 | -4.129770 | 3.896587  |
| C    | 4.515778  | 1.413351  | 0.947780  | H | 6.889337  | -2.815866 | 4.627186  | N | -5.637701 | -1.622784 | 0.295048  |
| H    | 4.960719  | 2.296385  | 1.399892  | H | 7.870553  | -5.600580 | 1.493000  | C | -0.566136 | 4.466103  | 0.197210  |
| C    | 5.229439  | 0.238090  | 0.921044  | C | 6.268319  | -4.808560 | -2.771503 | C | 0.855219  | 4.403551  | 0.189896  |
| C    | 4.640189  | -0.904474 | 0.322754  | H | 5.155539  | -3.568195 | -4.143214 | C | -1.202226 | 5.707304  | 0.343479  |
| C    | 3.367410  | -0.834930 | -0.226227 | H | 7.328504  | -5.837640 | -1.198827 | C | 1.598282  | 5.577181  | 0.325981  |
| C    | 2.619595  | 0.370323  | -0.231886 | H | 8.027530  | -4.879889 | 3.866290  | C | -0.459057 | 6.870070  | 0.501990  |
| H    | 6.234192  | 0.184401  | 1.321593  | H | 6.531768  | -5.535490 | -3.533751 | H | -2.284351 | 5.768523  | 0.304548  |
| H    | -6.297689 | 0.747851  | 1.334119  | N | 5.365341  | -2.117629 | 0.280093  | C | 0.945465  | 6.808330  | 0.493919  |
| In   | 0.027609  | 1.770375  | -1.211565 | C | -5.894894 | -2.420893 | -0.833156 | H | 2.680861  | 5.550098  | 0.277473  |
| C    | 0.045269  | 2.392637  | -3.256685 | C | -6.360379 | -2.147630 | 1.379079  | H | -0.956265 | 7.827713  | 0.607413  |
| H    | 0.005255  | 1.526010  | -3.923443 | C | -5.446603 | -2.277448 | -2.149714 | C | 1.716194  | 8.008243  | 0.629593  |

|   |          |          |          |
|---|----------|----------|----------|
| N | 2.342180 | 8.982577 | 0.744256 |
|---|----------|----------|----------|

---

**Table S10** Cartesian coordinates of the first singlet excited state ( $S_1$ ) fully optimized geometry in toluene of **CBZIn1** from B3LYP calculations (in Å)

| Atom | X         | Y         | Z         | H | -0.857211 | 2.494324  | -3.508554 | C | -6.958760 | -3.405961 | -0.425746 |
|------|-----------|-----------|-----------|---|-----------|-----------|-----------|---|-----------|-----------|-----------|
| N    | -1.164935 | 3.199371  | 0.072205  | H | 0.896815  | 2.689913  | -3.377207 | C | -6.536357 | -1.594878 | 2.703500  |
| N    | 1.492396  | 3.091863  | -0.054768 | H | 2.905198  | -1.798064 | -0.426593 | C | -7.244247 | -3.203116 | 0.979637  |
| O    | -1.463020 | 0.344820  | -0.414262 | H | -3.188438 | -1.510718 | -0.319624 | C | -6.034761 | -3.207707 | -3.051806 |
| O    | 1.433476  | 0.274113  | -0.531407 | C | 6.264344  | -2.599228 | 1.302549  | H | -4.916040 | -1.467802 | -2.412539 |
| C    | -2.725490 | 0.560249  | -0.075459 | C | 5.580793  | -2.992192 | -0.831730 | C | -7.383370 | -4.342528 | -1.375429 |
| C    | -3.598758 | -0.541870 | -0.055978 | C | 6.410173  | -2.095405 | 2.601090  | C | -7.330751 | -2.287164 | 3.615045  |
| C    | -4.942663 | -0.417041 | 0.301981  | C | 6.896977  | -3.798939 | 0.884992  | H | -5.958938 | -0.727561 | 3.003756  |
| C    | -5.459023 | 0.839357  | 0.667180  | C | 5.004350  | -2.898922 | -2.103405 | C | -8.034639 | -3.879534 | 1.916014  |
| C    | -4.616298 | 1.934896  | 0.671650  | C | 6.460464  | -4.048912 | -0.481204 | C | -6.917123 | -4.239937 | -2.684525 |
| H    | -5.013361 | 2.906561  | 0.955566  | C | 7.253415  | -2.790301 | 3.468199  | H | -5.687570 | -3.142489 | -4.079079 |
| C    | -3.239772 | 1.859144  | 0.307065  | H | 5.877509  | -1.210730 | 2.928107  | H | -8.070631 | -5.136514 | -1.096078 |
| C    | -2.480522 | 3.056752  | 0.379740  | C | 7.725444  | -4.479999 | 1.769488  | C | -8.076105 | -3.416288 | 3.229657  |
| H    | -3.007308 | 3.922483  | 0.775071  | C | 5.306217  | -3.905490 | -3.020808 | H | -7.371957 | -1.946823 | 4.645860  |
| C    | 2.685179  | 2.821226  | 0.364296  | H | 4.349581  | -2.078617 | -2.369745 | H | -8.605610 | -4.756410 | 1.623043  |
| H    | 3.274891  | 3.605570  | 0.849057  | C | 6.748052  | -5.040980 | -1.412448 | H | -7.238639 | -4.961000 | -3.430196 |
| C    | 3.332969  | 1.528685  | 0.284587  | C | 7.906619  | -3.961883 | 3.060294  | H | -8.686637 | -3.931996 | 3.964906  |
| C    | 4.674409  | 1.461493  | 0.709112  | H | 7.392014  | -2.423451 | 4.479546  | N | -5.792881 | -1.563576 | 0.291499  |
| H    | 5.164917  | 2.375991  | 1.030885  | H | 8.218641  | -5.400166 | 1.473216  | C | -0.515062 | 4.397998  | 0.166798  |
| C    | 5.387932  | 0.276860  | 0.715724  | C | 6.159814  | -4.964958 | -2.682603 | C | 0.923097  | 4.377858  | 0.085760  |
| C    | 4.733468  | -0.907142 | 0.286680  | H | 4.869805  | -3.863967 | -4.012984 | C | -1.129210 | 5.669526  | 0.347165  |
| C    | 3.415940  | -0.888512 | -0.133966 | H | 7.419602  | -5.857109 | -1.165759 | C | 1.665578  | 5.548319  | 0.128793  |
| C    | 2.663139  | 0.319638  | -0.156200 | H | 8.550294  | -4.485483 | 3.759313  | C | -0.380952 | 6.827631  | 0.409921  |
| H    | 6.435318  | 0.255452  | 0.990040  | H | 6.372969  | -5.735117 | -3.416447 | H | -2.208493 | 5.742433  | 0.400865  |
| H    | -6.507084 | 0.942109  | 0.927206  | N | 5.480538  | -2.111699 | 0.253662  | C | 1.029532  | 6.795616  | 0.294380  |
| In   | -0.065539 | 1.650411  | -1.033080 | C | -6.059822 | -2.375510 | -0.811599 | H | 2.743313  | 5.517109  | 0.009890  |
| C    | 0.060535  | 2.023937  | -3.142370 | C | -6.506253 | -2.057999 | 1.383317  | H | -0.879624 | 7.784471  | 0.528167  |
| H    | 0.204016  | 1.090197  | -3.694717 | C | -5.595181 | -2.263178 | -2.126679 | C | 1.793024  | 7.995286  | 0.325537  |



|   |          |          |          |
|---|----------|----------|----------|
| N | 2.423789 | 8.977244 | 0.354850 |
|---|----------|----------|----------|

---

**Table S11** Cartesian coordinates of the ground state ( $S_0$ ) fully optimized geometry in toluene of **CBZIn2** from B3LYP calculations (in Å)

| Atom | X         | Y         | Z         | H | 0.001029  | 1.001476  | -3.637808 | C | -6.760387 | -1.685904 | 1.255704  |
|------|-----------|-----------|-----------|---|-----------|-----------|-----------|---|-----------|-----------|-----------|
| N    | -1.340638 | 3.382270  | -0.129573 | H | -0.885276 | 2.524839  | -3.479812 | C | -4.947742 | -2.737662 | -1.733210 |
| N    | 1.340796  | 3.382310  | -0.129631 | H | 0.884808  | 2.526283  | -3.479552 | C | -6.709038 | -3.477510 | -0.192386 |
| O    | -1.474745 | 0.538656  | -0.287407 | H | 3.116796  | -1.378788 | -0.045373 | C | -7.129306 | -0.928566 | 2.371785  |
| O    | 1.474752  | 0.538724  | -0.287092 | H | -3.116854 | -1.378802 | -0.045719 | C | -7.361673 | -2.939812 | 0.984024  |
| C    | -2.748842 | 0.730265  | -0.097218 | C | 6.760511  | -1.686003 | 1.255580  | C | -5.146558 | -3.912921 | -2.456527 |
| C    | -3.588378 | -0.405547 | 0.014624  | C | 5.726890  | -2.536608 | -0.590145 | H | -4.215602 | -2.007397 | -2.056539 |
| C    | -4.956167 | -0.288155 | 0.220409  | C | 7.129669  | -0.928642 | 2.371571  | C | -6.888980 | -4.650486 | -0.934441 |
| C    | -5.557963 | 0.993925  | 0.344751  | C | 7.361637  | -2.939982 | 0.983888  | C | -8.139651 | -1.429368 | 3.191943  |
| C    | -4.764927 | 2.110850  | 0.268298  | C | 4.947260  | -2.737815 | -1.732949 | H | -6.644253 | 0.011965  | 2.605234  |
| H    | -5.217089 | 3.094791  | 0.361455  | C | 6.708760  | -3.477707 | -0.192375 | C | -8.372774 | -3.421849 | 1.823005  |
| C    | -3.358928 | 2.034405  | 0.049225  | C | 8.140099  | -1.429489 | 3.191596  | C | -6.101039 | -4.865375 | -2.061981 |
| C    | -2.639106 | 3.255125  | 0.066077  | H | 6.644734  | 0.011939  | 2.605054  | H | -4.548392 | -4.090998 | -3.345248 |
| H    | -3.220820 | 4.153390  | 0.290967  | C | 8.372829  | -3.422065 | 1.822735  | H | -7.637952 | -5.378731 | -0.636766 |
| C    | 2.639266  | 3.255164  | 0.065978  | C | 5.145846  | -3.913143 | -2.456215 | C | -8.762455 | -2.659161 | 2.920911  |
| H    | 3.221010  | 4.153429  | 0.290788  | H | 4.215124  | -2.007508 | -2.056192 | H | -8.444409 | -0.855395 | 4.062045  |
| C    | 3.359047  | 2.034416  | 0.049168  | C | 6.888468  | -4.650754 | -0.934378 | H | -8.840540 | -4.381629 | 1.623256  |
| C    | 4.765072  | 2.110820  | 0.268076  | C | 8.762755  | -2.659350 | 2.920533  | H | -6.227756 | -5.771997 | -2.645658 |
| H    | 5.217292  | 3.094751  | 0.361062  | H | 8.445038  | -0.855500 | 4.061623  | H | -9.546383 | -3.020384 | 3.579437  |
| C    | 5.558065  | 0.993865  | 0.344567  | H | 8.840477  | -4.381897 | 1.622958  | N | -5.764721 | -1.440526 | 0.292600  |
| C    | 4.956188  | -0.288202 | 0.220485  | C | 6.100315  | -4.865652 | -2.061767 | C | -0.691828 | 4.596528  | 0.019712  |
| C    | 3.588373  | -0.405549 | 0.014828  | H | 4.547507  | -4.091236 | -3.344816 | C | 0.691971  | 4.596550  | 0.019670  |
| C    | 2.748887  | 0.730289  | -0.097080 | H | 7.637420  | -5.379049 | -0.636773 | C | 1.425653  | 5.810579  | 0.207964  |
| H    | 6.630424  | 1.078715  | 0.467884  | H | 9.546754  | -3.020603 | 3.578958  | C | -1.425531 | 5.810536  | 0.208049  |
| H    | -6.630302 | 1.078811  | 0.468228  | H | 6.226846  | -5.772328 | -2.645398 | N | 2.075535  | 6.764746  | 0.358182  |
| In   | 0.000058  | 1.746282  | -1.016993 | N | 5.764687  | -1.440614 | 0.292634  | N | -2.075421 | 6.764693  | 0.358300  |
| C    | 0.000164  | 1.977232  | -3.142934 | C | -5.727150 | -2.536467 | -0.590254 |   |           |           |           |

**Table S12** Cartesian coordinates of the first singlet excited state ( $S_1$ ) fully optimized geometry in toluene of **CBZIn2** from B3LYP calculations (in Å)

| Atom | X         | Y         | Z         | H | 0.844554  | 2.939757  | 3.031155  | C | 7.367494  | -3.052482 | 0.432317  |
|------|-----------|-----------|-----------|---|-----------|-----------|-----------|---|-----------|-----------|-----------|
| N    | 1.374708  | 3.390657  | -0.374645 | H | -0.919928 | 2.821193  | 3.037825  | C | 4.574265  | -2.973511 | -1.899684 |
| N    | -1.343635 | 3.431686  | -0.344152 | H | -3.130410 | -1.322476 | 0.196482  | C | 6.534309  | -3.659995 | -0.583833 |
| O    | 1.446157  | 0.547229  | 0.057768  | H | 3.083314  | -1.395184 | 0.163084  | C | 8.513707  | -1.367546 | 2.336255  |
| O    | -1.461869 | 0.595349  | 0.065872  | C | -6.203880 | -2.189387 | -1.019370 | H | 6.987518  | 0.076121  | 1.823834  |
| C    | 2.739643  | 0.703221  | -0.106106 | C | -6.262971 | -1.969871 | 1.224001  | C | 8.484720  | -3.490839 | 1.154446  |
| C    | 3.563903  | -0.445349 | -0.042146 | C | -5.940172 | -1.990115 | -2.382292 | C | 4.620587  | -4.212732 | -2.535150 |
| C    | 4.941856  | -0.370842 | -0.210508 | C | -6.980187 | -3.280419 | -0.535317 | H | 3.820983  | -2.238713 | -2.160255 |
| C    | 5.566010  | 0.870802  | -0.446382 | C | -6.070447 | -1.509499 | 2.535227  | C | 6.556932  | -4.898793 | -1.237129 |
| C    | 4.781121  | 2.005864  | -0.510620 | C | -7.018041 | -3.138882 | 0.919890  | C | 9.055043  | -2.644237 | 2.101047  |
| H    | 5.251230  | 2.966017  | -0.708528 | C | -6.478326 | -2.917009 | -3.274294 | H | 8.967439  | -0.724623 | 3.085143  |
| C    | 3.373381  | 1.972214  | -0.351879 | H | -5.341917 | -1.151887 | -2.717682 | H | 8.897337  | -4.480779 | 0.979961  |
| C    | 2.671724  | 3.212425  | -0.518412 | C | -7.504071 | -4.187150 | -1.438346 | C | 5.597322  | -5.170606 | -2.208294 |
| H    | 3.279453  | 4.068657  | -0.821926 | C | -6.656960 | -2.250537 | 3.559875  | H | 3.884787  | -4.439962 | -3.301379 |
| C    | -2.649982 | 3.294731  | -0.434276 | H | -5.486933 | -0.618743 | 2.732812  | H | 7.317398  | -5.635032 | -0.991474 |
| H    | -3.248722 | 4.166625  | -0.707435 | C | -7.590796 | -3.857941 | 1.952649  | H | 9.922390  | -2.971480 | 2.666591  |
| C    | -3.376776 | 2.061706  | -0.244574 | C | -7.245833 | -3.994788 | -2.814125 | H | 5.603479  | -6.127499 | -2.721759 |
| C    | -4.784296 | 2.129254  | -0.335629 | H | -6.298466 | -2.801964 | -4.336885 | N | 5.728448  | -1.555171 | -0.150207 |
| H    | -5.242507 | 3.101573  | -0.496340 | H | -8.100085 | -5.031521 | -1.109234 | C | 0.740060  | 4.589084  | -0.630451 |
| C    | -5.601015 | 1.010782  | -0.235959 | C | -7.403060 | -3.402388 | 3.276897  | C | -0.681062 | 4.605469  | -0.614464 |
| C    | -4.975058 | -0.225062 | -0.046414 | H | -6.532599 | -1.931841 | 4.588303  | C | -1.404509 | 5.785581  | -0.926107 |
| C    | -3.596808 | -0.354226 | 0.051485  | H | -8.172365 | -4.753659 | 1.762932  | C | 1.482715  | 5.751339  | -0.951342 |
| C    | -2.752596 | 0.781548  | -0.034032 | H | -7.652336 | -4.701755 | -3.528979 | N | -2.063014 | 6.719344  | -1.171561 |
| H    | -6.679905 | 1.087813  | -0.308113 | H | -7.847993 | -3.961349 | 4.092765  | N | 2.148357  | 6.678378  | -1.207068 |
| H    | 6.637554  | 0.921942  | -0.600360 | N | -5.788839 | -1.420399 | 0.050216  |   |           |           |           |
| In   | 0.024893  | 1.877676  | 0.647209  | C | 6.842364  | -1.755645 | 0.671813  |   |           |           |           |
| C    | 0.000238  | 2.302049  | 2.750784  | C | 5.533468  | -2.709816 | -0.916336 |   |           |           |           |
| H    | 0.066407  | 1.381645  | 3.339537  | C | 7.403329  | -0.906583 | 1.631695  |   |           |           |           |
